# Supplementary material
Source: publisher site journal article supplement (https://www.dovepress.com/get_supplementary_file.php?f=479819.docx)
Supplement: Supplementary file 1 [file get_supplementary_file.php]

Novel multitargeted nanotechnological platform encapsulating Riluzole against motor neuron diseases

Gerard Esteruelas1,2,3, Miren Ettcheto4,5, Isabel Haro-Villar3, Mireia Herrando-Grabulosa5,6,Núria Gaja-Capdevila5,6, Maria José Gómara5, Xavier Navarro 5,6; Marta Espina1,2, Eliana B. Souto7,, Antoni Camins4,5,Maria Luisa García1,2,5*, Elena Sánchez-López1,2,3,5*

1 Department of Pharmacy, Pharmaceutical Technology and Physical Chemistry, Faculty of Pharmacy and Food Sciences, University of Barcelona, 08007 Barcelona, Spain

2 Institute of Nanoscience and Nanotechnology (IN2UB), University of Barcelona, 08007 Barcelona, Spain

3 Department of Pharmacology and Therapeutic Chemistry, Faculty of Pharmacy and Food Sience, University of Barcelona

4 Biomedical Research Network Center in Neurodegenerative Diseases (CIBERNED), Madrid, Spain

5 Unit of Synthesis & Biomedical applications of Peptides, IQAC-CSIC, 08034, Barcelona, Spain.

6 Group of Neuroplasticity and Regeneration, Department of Cell Biology, Physiology and Immunology, Institute of Neurosciences, Universitat Autonoma de Barcelona

7 UCD School of Chemical and Bioprocess Engineering, University College Dublin, Belfield, Dublin 4, D04 V1W8, Ireland


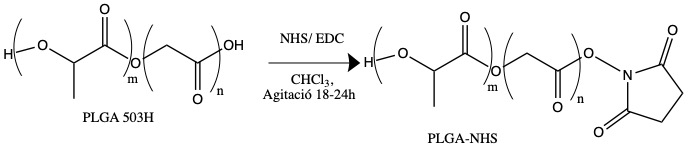


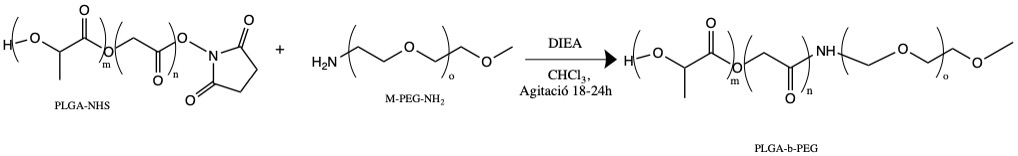


**Figure S1.** Chemistry reaction of PLGA-PEG synthesis.


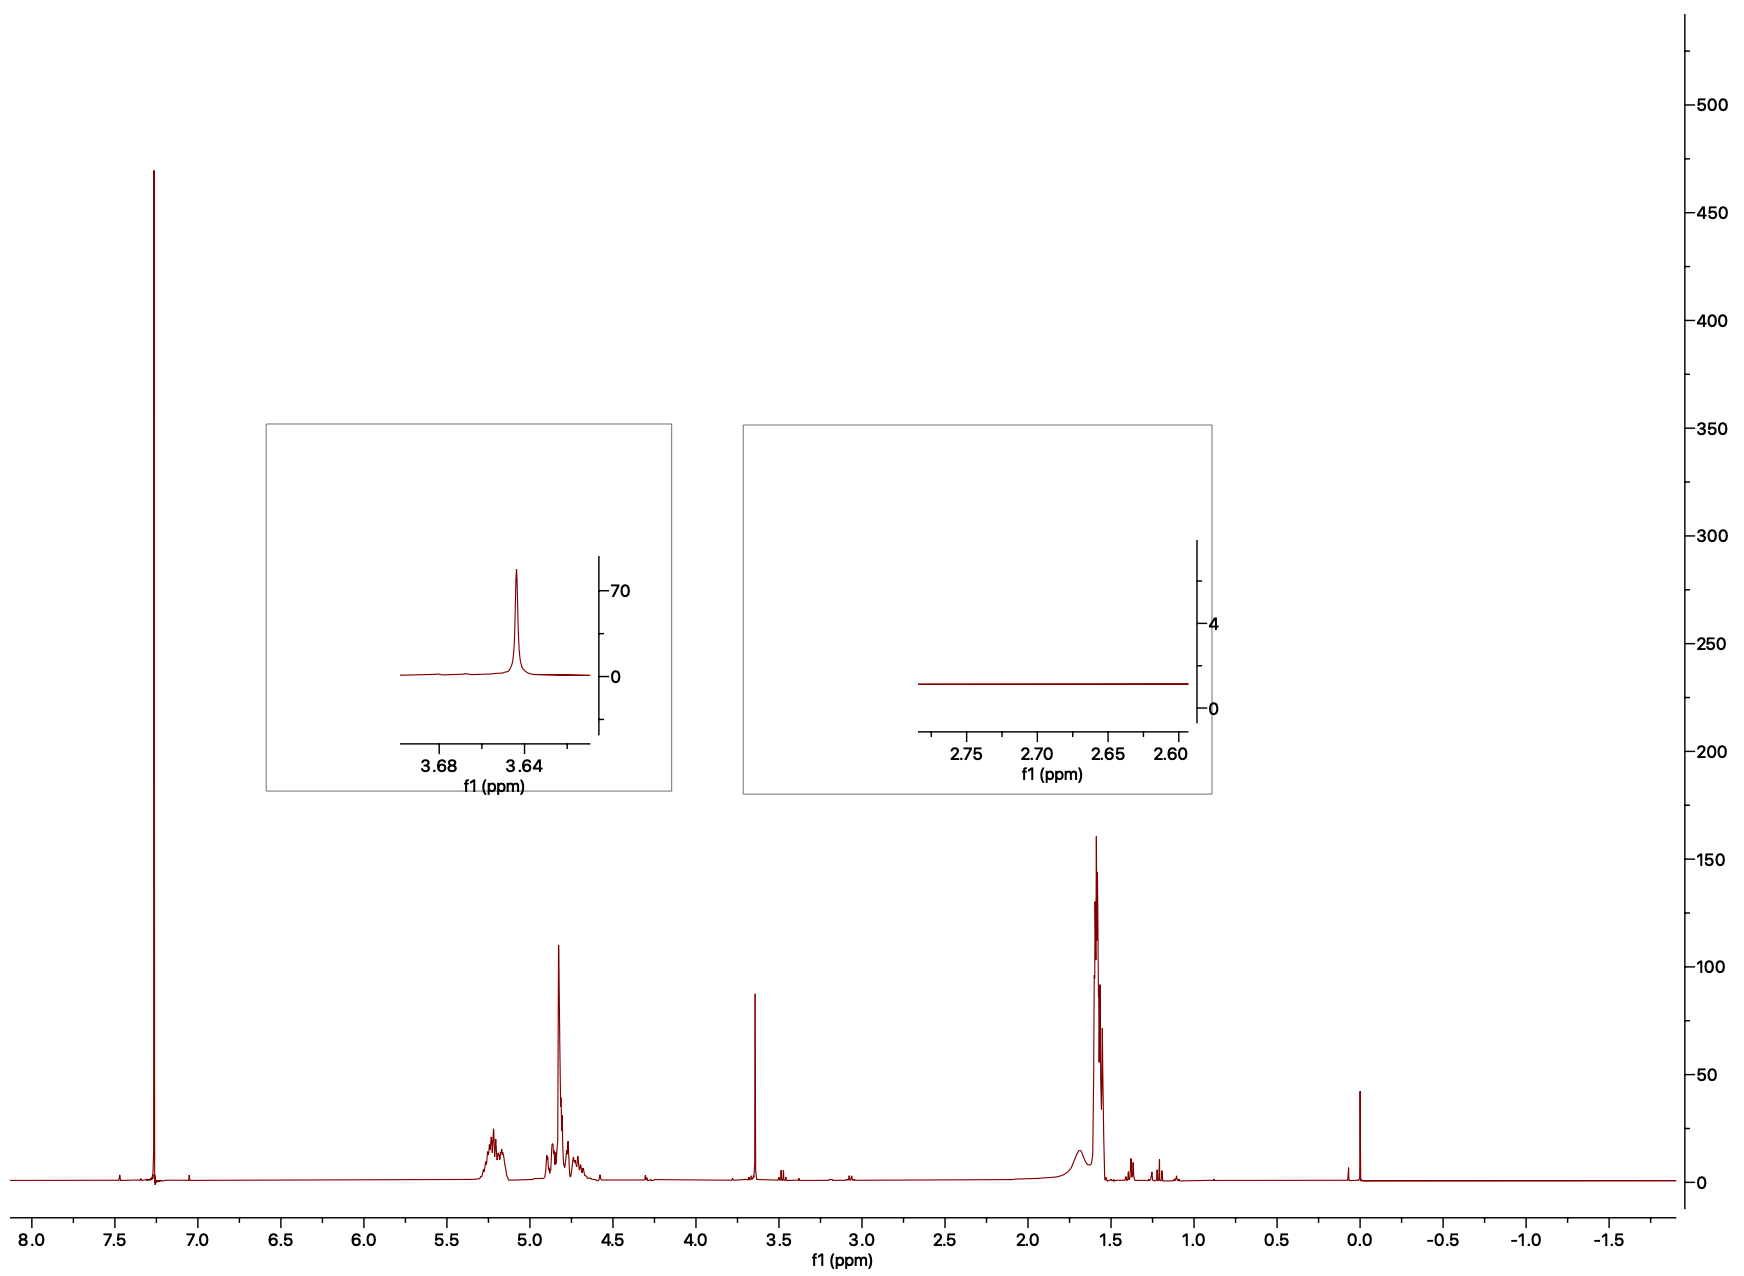


**Figure S2.** 1H-NMR obtained after the synthesis of PLGA-PEG.


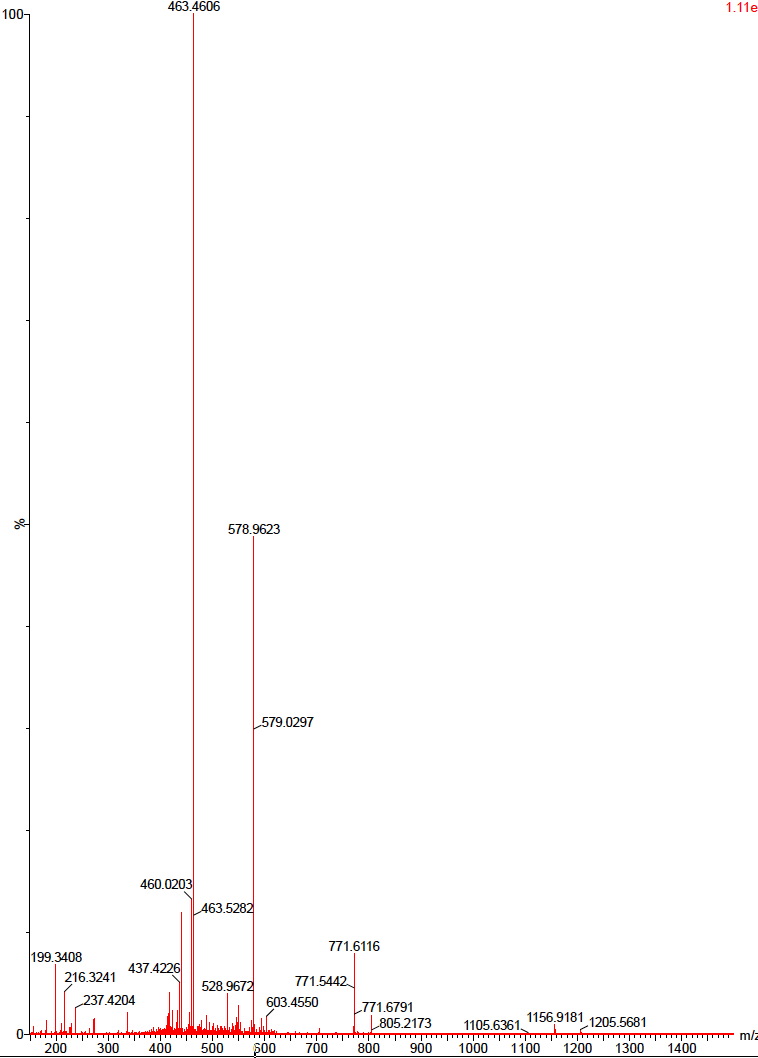


**Figure S3.** Mass spectrum corresponding to the synthesized pVEC.

**Figure S4.** Size distribution of pVEC-PEG-PLGA-RLZ NPs expressed as percentage of particles obtained by dynamic light scattering.

**Table S1** Comparison of the physicochemical characterization (Zav, PI, ZP and EE) of functionalized and non-functionalized nanoparticles and statistics performed.

| Formulation | ZAV  (nm) | PI | ZP  (mV) | EE  (%= |
| --- | --- | --- | --- | --- |
| pVEC-PEG-PLGA-RLZ NPs | 164.0 ±1.2 | 0.115 ± 0.05 | 19.2 ± 0.2 | 95.2 ± 0.4 |
| PLGA RLZ NPs | 148.2 ±1.4 | 0116 ± 0.011 | -30.0 ± 0.6 | 94.2 ± 0.8 |
| P-Value | <0.0001 | ns | <0.0001 | <0.001 |
